# Supplementary material for: How Repeatable Is the Ergogenic Effect of Caffeine? Limited Reproducibility of Acute Caffeine (3 mg.kg−1) Ingestion on Muscular Strength, Power, and Muscular Endurance
Source: MDPI journal article supplement (doi:10.3390/nu14204416), 2022-10-21
Supplement: s1 [file s1]

**Supplementary Table 1:** Between trial test-retest reliability of readiness to invest effort physically, readiness to invest effort mentally, and felt arousal pre-and post-treatment.

|                      |              | Placebo   |            |           |            | Caffeine  |            |            |            |
|----------------------|--------------|-----------|------------|-----------|------------|-----------|------------|------------|------------|
|                      |              | PL Trials | T1 vs T2   | T1 vs T3  | T2 vs T3   | CF Trials | T1 vs T2   | T1 vs T3   | T2 vs T3   |
| RTE Phy<br>(Pre)     | ICC          | .521      | .373       | .722      | .259       | .619      | .607       | .545       | .734       |
|                      | 95% CI       | .267-.740 | -.022-.676 | .445-.874 | -.125-.593 | .387-.802 | .252-.816  | .162-.783  | .456-.880  |
|                      | Significance | .001*     | .013*      | .001*     | .096       | .001*     | .001*      | .004*      | .000*      |
|                      | CV           | 37.6%     | 44.2%      | 29.9%     | 38.7%      | 24.4%     | 21.4%      | 25%        | 26.8%      |
|                      | Mean bias    |           | 1.7        | 0.6       | -1.0       |           | -0.1       | -0.2       | -0.1       |
|                      | Lo-Up LOA    |           | -3.0-6.3   | -3.0-4.2  | -6.0-3.9   |           | -3.6-3.4   | -4.3-4.0   | -3.2-3.1   |
| RTE Phy<br>(Post)    | ICC          | .258      | .269       | .489      | .001       | .147      | .329       | -.012      | .162       |
|                      | 95% CI       | .001-.543 | -.144-.600 | .094-.751 | -.322-.371 | .092-.444 | -.109-.656 | -.448-.414 | -.292-.546 |
|                      | Significance | .024*     | .086       | .010*     | .498       | .124      | .068       | .521       | .239       |
|                      | CV           | 36.4%     | 40.6%      | 26.1%     | 42.4%      | 20.4%     | 19.9%      | 20.4%      | 20.8%      |
|                      | Mean bias    |           | 1.2        | -0.3      | -1.5       |           | -0.2       | -0.3       | -0.1       |
|                      | Lo-Up LOA    |           | -4.4-6.8   | -4.6-3.9  | -7.6-4.6   |           | -4.1-3.7   | -5.1-4.4   | -4.9-4.6   |
| RTE<br>Men<br>(Pre)  | ICC          | .504      | .546       | .589      | .294       | .381      | .394       | .547       | .171       |
|                      | 95% CI       | .249-.729 | .182-.781  | .225-.807 | -.090-.618 | .117-.641 | .002-.689  | .168-.784  | -.263-.546 |
|                      | Significance | .001*     | .002*      | .002*     | .068       | .002*     | .026*      | .004*      | .220       |
|                      | CV           | 36.8%     | 36.9%      | 35.9%     | 37.5%      | 31.7%     | 30.7%      | 30.1%      | 34.3%      |
|                      | Mean bias    |           | 0.9        | -0.1      | -1.0       |           | 0.7        | 0.2        | -0.5       |
|                      | Lo-Up LOA    |           | -2.9-4.7   | -4.2-4.0  | -5.6-3.6   |           | -3.4-4.8   | -4.1-4.5   | -5.8-4.8   |
| RTE<br>Men<br>(Post) | ICC          | .240      | .310       | .368      | .090       | .321      | .586       | .115       | .299       |
|                      | 95% CI       | .014-.528 | -.104-.637 | .049-.677 | -.267-.458 | .059-.595 | .228-.805  | -.324-.508 | -.146-.638 |
|                      | Significance | .033*     | .072       | .042*     | .322       | .007*     | .002*      | .304       | .089       |
|                      | CV           | 35.6%     | 35.7%      | 32.2%     | 38.9%      | 20.5%     | 16.9%      | 24.9%      | 19.6%      |
|                      | Mean bias    |           | 0.7        | -0.7      | -1.4       |           | 0.2        | 0.4        | 0.1        |
|                      | Lo-Up LOA    |           | -4.7-6.1   | -5.4-4.0  | -7.0-4.2   |           | -2.9-3.3   | -4.4-5.1   | -3.9-4.2   |
| FAS<br>(Pre)         | ICC          | .564      | .474       | .695      | .382       | .587      | .755       | .559       | .454       |
|                      | 95% CI       | .319-.768 | .096-.738  | .393-.861 | .002-.679  | .346-.782 | .500-.890  | .184-.791  | .038-.732  |
|                      | Significance | .001*     | .006*      | .001*     | .017*      | .001*     | .001*      | .003*      | .017*      |
|                      | CV           | 23.7%     | 24.8%      | 19.6%     | 26.6%      | 20.2%     | 16.2%      | 24%        | 20.4%      |

|        |              |           |           |           |           |           |           |            |           |
|--------|--------------|-----------|-----------|-----------|-----------|-----------|-----------|------------|-----------|
|        | Mean bias    |           | 1         | 0         | -1        |           | 1         | 0          | 0         |
|        | Lo-Up LOA    |           | -2 - 3    | -2 - 2    | -3 - 1    |           | -1 - 2    | -2 - 2     | -2 - 2    |
|        | ICC          | .377      | .288      | .500      | .287      | .366      | .520      | .119       | .475      |
|        | 95% CI       | .114-.639 | .110-.618 | .112-.757 | .079-.608 | .103-.630 | .129-.769 | -.334-.515 | .068-.744 |
| FAS    | Significance | .002*     | .080      | .008*     | .057      | .003*     | .006*     | .302       | .013*     |
| (Post) | CV           | 24.3%     | 25.8%     | 20.3%     | 26.9%     | 15.8%     | 12%       | 22.2%      | 13.3%     |
|        | Mean bias    |           | 1         | 0         | 1         |           | 0         | 0          | 0         |
|        | Lo-Up LOA    |           | -3 - 4    | -3 - 2    | -2 - 4    |           | -2 - 2    | -3 - 3     | -2 - 2    |

Note: RTE Phy= Readiness to Invest Effort Physical, RTE Men= Readiness to Invest Effort Mental, FAS= Felt Arousal, T1= Trial 1, T2= Trial 2, T3= Trial 3, ICC= Intra-class correlation, 95% CI= 95% confidence interval, CV= Coefficient of variation, and Lo-Up LOA= Lower and Upper 95% limits of agreement, Effect Size = Trivial < Bold Text, \*= P<0.05.

### *Effect of Caffeine on Countermovement Jump Performance*

**Supplementary Table 2:** Between trial test-retest reliability of CMJ performance

|            |              | Placebo   |           |           |           | Caffeine  |           |           |           |
|------------|--------------|-----------|-----------|-----------|-----------|-----------|-----------|-----------|-----------|
|            |              | PL Trials | T1 vs T2  | T1 vs T3  | T2 vs T3  | CF Trials | T1 vs T2  | T1 vs T3  | T2 vs T3  |
|            | ICC          | .870      | .893      | .841      | .881      | .786      | .745      | .805      | .767      |
|            | 95% CI       | .757-939  | .760-.954 | .656-.931 | .735-.949 | .621-896  | .475-.886 | .555-.917 | .485-.900 |
| Jump       | Significance | .001*     | .001*     | .001      | .001*     | .001*     | .001*     | .001*     | .001*     |
| height (m) | CV           | 9.2%      | 8.6%      | 9.9%      | 9.1       | 11.3%     | 13.3%     | 9%        | 11.6%     |
|            | Mean bias    |           | .003      | .004      | .001      |           | .001      | .021      | .021      |
|            | Lo-Up LOA    |           | -.07-.07  | -.07-.08  | -.07-.07  |           | -.11-.11  | -.06-.10  | -.06-.10  |
|            | ICC          | .680      | .716      | .683      | .660      | .793      | .761      | .823      | .799      |
|            | 95% CI       | .467-.838 | .436-870  | .378-.855 | .335-.844 | .631-.900 | .509-.893 | .619-923  | .578-911  |
| RSI (Mod)  | Significance | .001*     | .001*     | .001*     | .001*     | .001*     | .001*     | .001*     | .001*     |
|            | CV           | 15.2%     | 13.7%     | 18.1%     | 12.6%     | 12.7%     | 16.4%     | 11.8%     | 10.4%     |
|            | Mean bias    |           | -.020     | -.015     | .003      |           | .018      | .028      | .009      |
|            | Lo-Up LOA    |           | -.20-.16  | -.21-.18  | -.23-.23  |           | -.17-.21  | -.11-.16  | -.13-.15  |
|            | ICC          | .877      | .838      | .880      | .882      | .752      | .724      | .767      | .791      |
|            | 95% CI       | .770-.942 | .629-.932 | .676-.952 | .737-949  | .569-.878 | .439-.876 | .520-896  | .561-908  |
| Peak Force | Significance | .001*     | .001*     | .001*     | .001*     | .001      | .001*     | .001*     | .001*     |
| (NKg-1)    | CV           | 8.0%      | 9.2%      | 7.9%      | 6.9%      | 8.2%      | 8.3%      | 8%        | 8.2%      |
|            | Mean bias    |           | -.94      | -.92      | .02       |           | .08       | .29       | .21       |

|            |              |           |           |           |           |           |            |           |           |
|------------|--------------|-----------|-----------|-----------|-----------|-----------|------------|-----------|-----------|
|            | Lo-Up LOA    |           | -4.9-3.0  | -4.1-2.3  | -3.6-3.6  |           | -5.2-5.3   | -4.2-4.8  | -4.4-4.8  |
|            | ICC          | .881      | .931      | .811      | .901      | .745      | .808       | .833      | .893      |
|            | 95% CI       | .777-.944 | .843-.971 | .602-.917 | .776-.958 | .560-.874 | .599-.915  | .645-.927 | .760-.954 |
| Peak Power | Significance | .001*     | .001*     | .001*     | .001*     | .001*     | .001*      | .001*     | .001*     |
| (WKg-1)    | CV           | 5.4%      | 5.2%      | 6%        | 5%        | 6.4%      | 7.1%       | 5.9%      | 6.2%      |
|            | Mean bias    |           | -.87      | 0.13      | 1.01      |           | 1.90       | 2.64      | 0.74      |
|            | Lo-Up LOA    |           | -8.2-6.5  | -8.3-8.6  | -6.1-8.1  |           | -10.7-14.5 | -9.0-14.3 | -8.7-10.2 |
|            | ICC          | .857      | .909      | .770      | .907      | .917      | .913       | .934      | .905      |
| Con        | 95% CI       | .736-.933 | .794-.961 | .521-.898 | .790-.960 | .841-.962 | .804-.963  | .850-.972 | .768-.959 |
| Impulse    | Significance | .001*     | .001*     | .001*     | .001*     | .001*     | .001*      | .001*     | .001*     |
| (Ns)       | CV           | 5.5%      | 5.5%      | 6.6%      | 5.5%      | 5.5%      | 5.3%       | 5.5%      | 6.8%      |
|            | Lo-Up LOA    |           | -37-40    | -63-62    | -43-39    |           | -37-42     | -36-30    | -44-33    |
|            | ICC          | .815      | .711      | .762      | .931      | .866      | .873       | .852      | .841      |
| Ecc        | 95% CI       | .667-.911 | .420-.869 | .514-.893 | .842-.971 | .750-.937 | .719-.945  | .649-.938 | .649-.932 |
| Impulse    | Significance | .001*     | .001*     | .001*     | .001*     | .001*     | .001*      | .001*     | .001*     |
| (Ns)       | CV           | 10.2%     | 9.9%      | 11.2%     | 10.2%     | 8.8%      | 7.8%       | 8.8%      | 10%       |
|            | Mean bias    |           | -2        | -4        | -2        |           | -1         | -6        | -5        |
|            | Lo-Up LOA    |           | -46-42    | -44-36    | -28-25    |           | -22-20     | -30-18    | -29-19    |

Note: Con= Concentric, Ecc= Eccentric, T1= Trial 1, T2= Trial 2, T3= Trial 3, RSI (mod)= Reactive Strength Index (modified) ICC= Interclass correlation, 95% CI= 95% confidence interval, CV= Coefficient of variation, Lo-Up LOA= Lower and Upper 95% limits of agreement, Effect Size = Trivial < Bold Text \* = P< 0.05.

#### *Effect of Caffeine on Drop Jump Performance*

**Supplementary Table 3:** Between trial test-retest reliability of DJ performance

|     |              | Placebo   |            |            |           | Caffeine  |           |            |           |
|-----|--------------|-----------|------------|------------|-----------|-----------|-----------|------------|-----------|
|     |              | PL Trials | T1 vs T2   | T1 vs T3   | T2 vs T3  | CF Trials | T1 vs T2  | T1 vs T3   | T2 vs T3  |
|     | ICC          | .313      | .175       | .265       | .468      | .475      | .470      | .300       | .657      |
|     | 95% CI       | .052-.589 | -.257-.549 | -.166-.612 | .091-.749 | .216-.709 | .071-.740 | -.129-.634 | .334-.841 |
|     | Significance | .009*     | .212       | .110       | .009*     | .001*     | .012*     | .082       | .001*     |
|     | CV           | 21.5%     | 23.9%      | 22.1%      | 18.5%     | 17.7%     | 20.2%     | 19.7%      | 13.3%     |
|     | Mean bias    |           | .005       | .002       | -.007     |           | -.025     | -.004      | .021      |
|     | Lo-Up LOA    |           | -.26-.27   | -.26 - .25 | -.22-.21  |           | -.25-.21  | -.24-.23   | -.15.19   |
| RSI | ICC          | .902      | .865       | .886       | .957      | .902      | .857      | .899       | .941      |

|                       |              |           |            |            |            |           |            |            |             |
|-----------------------|--------------|-----------|------------|------------|------------|-----------|------------|------------|-------------|
|                       | 95% CI       | .813-.954 | .703-.942  | .746-.951  | .899-.982  | .814-.955 | .687-.938  | .772-.957. | .863-.975.  |
|                       | Significance | .001*     | .001*      | .001*      | .001*      | .001*     | .001*      | .001*      | .001*       |
|                       | CV           | 10.3%     | 12.1%      | 11.7%      | 7%         | 9.3%      | 10.6%      | 9.7%       | 7.8%        |
|                       | Mean bias    |           | -.031      | -.043      | -.012      |           | -.015      | -.027      | -.013       |
|                       | Lo-Up LOA    |           | -.43 -.36  | -.41 -.32  | -.23 -.21  |           | -.40 -.37  | -.38 -.32  | -.29 -.27   |
| Peak Force<br>(N. Kg) | ICC          | .600      | .598       | .665       | .531       | .543      | .471       | .580       | .568        |
|                       | 95% CI       | .362-.790 | .246-.811  | .348-.846  | .151-.774  | .294-.754 | .071-.740  | .219-.801  | .203-.795   |
|                       | Significance | .001*     | .001*      | .001*      | .005*      | .001*     | .012*      | .002*      | .002*       |
|                       | CV           | 9.9%      | 9.2%       | 9.7%       | 10.8%      | 12.1%     | 12.9%      | 12.1%      | 11.2%       |
|                       | Mean bias    |           | .99        | 1.76       | .77        |           | -2.37      | -.18       | 2.55        |
|                       | Lo-Up LOA    |           | -16.3-18.3 | -15.6-19.2 | -19.3-20.9 |           | -24.6-19.8 | -21.5-21.8 | -18.7- 23.8 |
| Peak Power<br>(W. Kg) | ICC          | .388      | .258       | .351       | .559       | .421      | .435       | .450       | .441        |
|                       | 95% CI       | .125-.647 | -.174-.607 | -.072-.668 | .190-.790  | .158-.671 | .026-.719  | .046-.728  | .034-.723   |
|                       | Significance | .002*     | .117       | .050*      | .003*      | .001*     | .019*      | .016*      | .018*       |
|                       | CV           | 21.2%     | 21.5%      | 26%        | 16%        | 20.9%     | 25.1%      | 22%        | 15.7%       |
|                       | Mean bias    |           | 2.27       | -13.10     | 0.30       |           | 1.18       | 8.21       | 7.03        |
|                       | Lo-Up LOA    |           | -43.1-47.7 | -71.6-45.4 | -35.0-35.6 |           | -58.3-60.6 | -46.2-62.7 | -38.7-52.7  |

Note: T1= Trial 1, T2= Trial 2, T3= Trial 3, RSI= Reactive Strength Index, ICC= Interclass correlation, 95% CI= 95% confidence interval, CV= Coefficient of variation, and Lo-Up LOA= Lower and Upper 95% limits of agreement, Effect Size = Trivial < Bold Text, \*= P< 0.05.

#### *Isometric Mid-Thigh Pull*

**Supplementary Table 4:** Between trial test-retest reliability of IMTP performance

|                          |              | Placebo   |             |            |           | Caffeine  |           |           |           |
|--------------------------|--------------|-----------|-------------|------------|-----------|-----------|-----------|-----------|-----------|
|                          |              | PL Trials | T1 vs T2    | T1 vs T3   | T2 vs T3  | CF Trials | T1 vs T2  | T1 vs T3  | T2 vs T3  |
| Peak<br>Force (N.<br>Kg) | ICC          | .324      | .323        | .141       | .652      | .875      | .863      | .923      | .836      |
|                          | 95% CI       | .062-.597 | -.066-.639  | -.283-.522 | .334-.838 | .766-.941 | .697-.941 | .826-.967 | .648-.928 |
|                          | Significance | .007*     | .053        | .260       | .001*     | .001*     | .001*     | .001*     | .001*     |
|                          | CV           | 13.1%     | 13.1%       | 14.5%      | 8.2%      | 4.5%      | 4.5%      | 4.3%      | 5.1%      |
|                          | Mean bias    |           | 2.81        | 1.96       | -.85      |           | -.91      | -.47      | .44       |
|                          | Lo-Up LOA    |           | -11.1-18.8. | -15.0-19.0 | -8.4-6.7  |           | -5.9-4.1  | -4.0-3.1  | -5.1-6    |
|                          | ICC          | .367      | .520        | .454       | .077      | .416      | .193      | .398      | .684      |

|                          |              |           |            |            |            |           |            |            |            |
|--------------------------|--------------|-----------|------------|------------|------------|-----------|------------|------------|------------|
| Time to peak force (Sec) | 95% CI       | .104-.631 | .128-.769  | .061-.728  | -.333-.470 | .154-.668 | -.253-.566 | -.033-.700 | .381-.855. |
|                          | Significance | .003*     | .006*      | .014*      | .361       | .001*     | .195       | .034*      | .001*      |
|                          | CV           | 40%       | 34.9%      | 39.1%      | 46%        | 37%       | 39.8%      | 38.5%      | 32.5%      |
|                          | Mean bias    |           | -.12       | .35        | .47        |           | -.19       | .01        | .19        |
|                          | Lo-Up LOA    |           | -3.14-2.91 | -2.42-3.13 | -3.07-4.02 |           | -3.48-3.10 | -2.94-2.94 | -1.85-2.23 |
| Force (N) at 100 m/s     | ICC          | .740      | .748       | .674       | .817       | .614      | .668       | .635       | .548       |
|                          | 95% CI       | .552-.872 | .481-.887  | .356-.851  | .608-.920  | .381-.799 | .357-.847  | .301-.830  | .165-.785  |
|                          | Significance | .001*     | .001*      | .001*      | .001*      | .001*     | .001*      | .001*      | .004*      |
|                          | CV           | 11%       | 9.3%       | 12.7%      | 10.2%      | 12.4%     | 10.6%      | 9.3%       | 14.6%      |
|                          | Mean bias    |           | -1         | 3          | 4          |           | -57        | -47        | 10         |
|                          | Lo-Up LOA    |           | -461-458   | -552-557   | -437-445   |           | -652-538   | -717-623   | -647-667   |
| Force (N) at 300 m/s     | ICC          | .746      | .750       | .800       | .699       | .745      | .245       | .761       | .337       |
|                          | 95% CI       | .561-.875 | .489-.888  | .576-.912  | .404-.863  | .559-.874 | -.204-.602 | .510-.893  | -.089-.659 |
|                          | Significance | .001*     | .001*      | .001*      | .001*      | .001*     | .138       | .001*      | .060       |
|                          | CV           | 9.2%      | 8%         | 9.5%       | 10%        | 8.3%      | 7.3%       | 8.8%       | 8.8%       |
|                          | Mean bias    |           | 41         | -19        | -60        |           | 43         | -48        | -91        |
|                          | Lo-Up LOA    |           | -562-643   | -680-641   | -825-705   |           | -1120-1205 | -647-551   | -1097-915  |

Note: T1= Trial 1, T2= Trial 2, T3= Trial 3, ICC= Interclass correlation, 95% CI= 95% confidence interval, CV= Coefficient of variation, and Lo-Up LOA= Lower and Upper 95% limits of agreement, Effect Size = Trivial < Bold Text, \*= P< 0.05.

### *Effect of Caffeine on Repetition until Failure*

**Supplementary Table 5:** Between trial test-retest reliability of repetitions until failure during Chest Press, Shoulder Press, Squats, and Deadlifts.

|          |              | Placebo   |           |           |           | Caffeine  |           |           |           |
|----------|--------------|-----------|-----------|-----------|-----------|-----------|-----------|-----------|-----------|
|          |              | PL Trials | T1 vs T2  | T1 vs T3  | T2 vs T3  | CF Trials | T1 vs T2  | T1 vs T3  | T2 vs T3  |
| CP Set 1 | ICC          | .723      | .514      | .489      | .761      | .656      | .605      | .685      | .793      |
|          | 95% CI       | .527-.862 | .118-.767 | .106-.749 | .508-.893 | .435-.824 | .248-.816 | .379-.856 | .556-.909 |
|          | Significance | .001*     | .007*     | .008*     | .001*     | .001*     | .001*     | .001*     | .001*     |
|          | CV           | 17.1%     | 17.6%     | 16.6%     | 16.9%     | 13.2%     | 14.8%     | 14.2%     | 10.5%     |
|          | Mean bias    |           | .14       | -1.14     | -1.27     |           | .23       | .50       | .27       |
|          | Lo-Up LOA    |           | -7 - 8    | -10 -8    | -8 - 5    |           | -7 - 8    | -6 - 7    | -5 - 6    |
| CP Set 2 | ICC          | .525      | .487      | .481      | .731      | .512      | .636      | .620      | .792      |

|          |              |           |            |            |            |           |            |            |            |
|----------|--------------|-----------|------------|------------|------------|-----------|------------|------------|------------|
| SP Set 1 | 95% CI       | .273-.742 | .083-.751  | .098-.743  | .452-.879  | .258-.734 | .311-.830  | .283-.822  | .561-.908  |
|          | Significance | .001*     | .011*      | .009*      | .001*      | .001*     | .001*      | .001*      | .001*      |
|          | CV           | 18.9%     | 19.4%      | 20.1%      | 17.2%      | 14.5%     | 13.4%      | 17%        | 13%        |
|          | Mean bias    |           | -.27       | -1.00      | -.73       |           | .73        | .73        | .00        |
|          | Lo-Up LOA    |           | -8 - 8     | -8 - 6     | -6 - 5     |           | -5 - 7     | -6 - 8     | -5 -5      |
|          | ICC          | .476      | .525       | .432       | .202       | .694      | .577       | .564       | .660       |
|          | 95% CI       | .217-.709 | .079-.783  | .010-.720  | -.145-.539 | .486-.846 | .227-.797  | .191-.793  | .346-.842  |
|          | Significance | .001*     | .001*      | .023*      | .132       | .001*     | .002*      | .003*      | .001*      |
|          | CV           | 18.2%     | 18.2%      | 13.6%      | 22.9%      | 13.2%     | 15.6%      | 13.2%      | 10.6%      |
|          | Mean bias    |           | 1.91       | -.09       | -2.00      |           | .95        | .32        | -.64       |
|          | Lo-Up LOA    |           | -3 - 7     | -6 - 5     | -9 - 5     |           | -6 - 8     | -6 - 7     | -6 - 5     |
| SP Set 2 | ICC          | .453      | .321       | .258       | .467       | .571      | .297       | .329       | .402       |
|          | 95% CI       | .192-.693 | -.120-.652 | -.178-.608 | .080-.736  | .326-.772 | -.115-.628 | -.098-.653 | -.018-.700 |
|          | Significance | .001*     | .073       | .121       | .011*      | .001*     | .080       | .065       | .031*      |
|          | CV           | 20.2%     | 21.8%      | 17.9%      | 21.1%      | 15.7%     | 16.3%      | 15.9%      | 14.8%      |
|          | Mean bias    |           | .27        | -.55       | -.82       |           | 1.00       | .55        | -.45       |
|          | Lo-Up LOA    |           | -7 - 7     | -7 - 6     | -7 - 5     |           | -6 - 8     | -5 - 7     | -7 - 6     |
| SQ Set 1 | ICC          | .551      | .746       | .491       | .376       | .349      | .487       | .581       | .659       |
|          | 95% CI       | .303-.760 | .484-.886  | .101-.751  | -.027-.679 | .086-.617 | .086-.751  | .218-.802  | .332-.844  |
|          | Significance | .001*     | .001*      | .009*      | .036*      | .004*     | .010*      | .002*      | .001*      |
|          | CV           | 14.5%     | 11.2%      | 14.1%      | 18.3%      | 15.1%     | 18.2       | 14.9%      | 12.3%      |
|          | Mean bias    |           | .50        | -.73       | -1.23      |           | -.50       | -.55       | -.05       |
|          | Lo-Up LOA    |           | -5 - 6     | -8 - 7     | -10 - 7    |           | -9 - 8     | -9 - 8     | -8 - 8     |
| SQ Set 2 | ICC          | .507      | .592       | .430       | .299       | .384      | .564       | .622       | .840       |
|          | 95% CI       | .252-.731 | .248-.806  | .010-.718  | -.137-.636 | .121-.644 | .199-.792  | .275-.825  | .653-.930  |
|          | Significance | .001*     | .001*      | .023*      | .087       | .002*     | .003*      | .001*      | .001*      |
|          | CV           | 16.6%     | 12.4%      | 17.8%      | 19.6%      | 12.1%     | 13.6%      | 14%        | 8.7%       |
|          | Mean bias    |           | .91        | .27        | -.64       |           | -.59       | .14        | .73        |
|          | Lo-Up LOA    |           | -6 - 7     | -7 - 8     | -9 - 8     |           | -7 - 6     | -6 - 7     | -3 - 5     |
| DL Set 1 | ICC          | .741      | .709       | .761       | .701       | .682      | .636       | .773       | .668       |
|          | 95% CI       | .554-.872 | .426-.876  | .505-.894  | .413-.863  | .470-.839 | .304-.830  | .525-.899  | .356-.847  |

|          |              |           |           |           |           |           |           |           |           |
|----------|--------------|-----------|-----------|-----------|-----------|-----------|-----------|-----------|-----------|
|          | Significance | .001*     | .001*     | .001*     | .001*     | .001*     | .001*     | .001*     | .001*     |
|          | CV           | 15.5%     | 17.8%     | 12%       | 16.6%     | 15%       | 17.9%     | 17.2%     | 9.9%      |
|          | Mean bias    |           | .91       | -.18      | -1.09     |           | .68       | -.14      | -.82      |
|          | Lo-Up LOA    |           | -5 - 7    | -7 - 7    | -8 - 6    |           | -8 - 9    | -9 - 8    | -10 - 8   |
| DL Set 2 | ICC          | .703      | .753      | .773      | .705      | .610      | .601      | .409      | .758      |
|          | 95% CI       | .498-.851 | .496-.889 | .526-.899 | .415-.886 | .375-.796 | .244-.813 | .019-.706 | .506-.891 |
|          | Significance | .001*     | .001*     | .001*     | .001*     | .001*     | .001*     | .030*     | .001*     |
|          | CV           | 18.4%     | 22.2%     | 12.4%     | 20.8%     | 18.1%     | 19.2%     | 23.7%     | 11.5%     |
|          | Mean bias    |           | 1.00      | -.05      | -1.05     |           | .27       | -.18      | -.45      |
|          | Lo-Up LOA    |           | -5 - 7    | -5 - 5    | -6 - 4    |           | -7 - 7    | -8 - 8    | -5 - 4    |

Note: RTF= Reps until Failure, CP= Chest Press, SP= Shoulder Press, SQ= Squats, DL= Deadlifts, T1= Trial 1, T2= Trial 2, T3= Trial 3, ICC= Interclass correlation, 95% CI= 95% confidence interval, CV= Coefficient of variation, and Lo-Up LOA= Lower and Upper 95% limits of agreement, Effect Size = Trivial < Bold Text, \* = P< 0.05.

#### *Effect of Caffeine on Rate of Perceived Exertion*

**Supplementary Table 6:** Between trial test-retest reliability of rate of perceived exertion following repetitions until failure protocol.

|          |              | Placebo   |            |           |            | Caffeine  |            |           |            |
|----------|--------------|-----------|------------|-----------|------------|-----------|------------|-----------|------------|
|          |              | PL Trials | T1 vs T2   | T1 vs T3  | T2 vs T3   | CF Trials | T1 vs T2   | T1 vs T3  | T2 vs T3   |
| CP Set 1 | ICC          | .428      | .234       | .450      | .452       | .637      | .728       | .504      | .602       |
|          | 95% CI       | .166-.676 | -.217-.595 | .035-.729 | .042-.730  | .409-.813 | .448-.878  | .104-.761 | .264-.811  |
|          | Significance | .001*     | .150       | .018*     | .017*      | .001*     | .001*      | .008*     | .001*      |
|          | CV           | 4.4%      | 5.3%       | 3.4%      | 4.6%       | 3.3%      | 2.2%       | 4.0%      | 3.7%       |
|          | Mean bias    |           | -.09       | .09       | .18        |           | -.36       | .00       | .36        |
|          | Lo-Up LOA    |           | -4-4       | -2-2      | -3-3       |           | -2-1       | -3-3      | -2-3       |
| CP Set 2 | ICC          | .448      | .619       | .511      | .394       | .466      | .327       | .426      | .406       |
|          | 95% CI       | .187-.690 | .288-.820  | .140-.760 | -.037-.697 | .206-.703 | -.070-.644 | .045-.707 | -.020-.704 |
|          | Significance | .001*     | .001*      | .005*     | .036*      | .001*     | .055       | .012*     | .031*      |
|          | CV           | 2.9%      | 2.2%       | 3%        | 3.5%       | 3.3%      | 3.4%       | 3.7%      | 2.8%       |
|          | Mean bias    |           | .36        | .32       | -.05       |           | -.41       | -.50      | -.09       |
|          | Lo-Up LOA    |           | -2-2       | -2-2      | -3-3       |           | -3-2       | -3-2      | -2-2       |
| SP Set 1 | ICC          | .398      | .457       | .574      | .319       | .326      | .210       | .173      | .195       |

|          |              |           |            |            |            |           |            |            |            |
|----------|--------------|-----------|------------|------------|------------|-----------|------------|------------|------------|
|          | 95% CI       | .135-.654 | .080-.727  | .210-.798  | -.095-.643 | .064-.599 | -.242-.579 | -.270-.550 | -.252-.567 |
|          | Significance | .001*     | .009*      | .002*      | .066       | .007*     | .177       | .220       | .193       |
|          | CV           | 3.7%      | 3.8%       | 2.8%       | 4.4%       | 5.6%      | 6.1%       | 6.0%       | 4.6%       |
|          | Mean bias    |           | -.50       | -.14       | .36        |           | -.14       | -.32       | -.18       |
|          | Lo-Up LOA    |           | -3-2       | -2-2       | -2-3       |           | -5-5       | -5-4       | -3-3       |
| SP Set 2 | ICC          | .163      | -.098      | .249       | .149       | .495      | .359       | .649       | .269       |
|          | 95% CI       | .080-.459 | -.502-.333 | -.201-.605 | -.298-.535 | .238-.722 | -.076-.676 | .317-.838  | -.174-.617 |
|          | Significance | .102      | .670       | .134       | .255       | .001*     | .051       | .001*      | .113       |
|          | CV           | 4.8%      | 4.6%       | 4.7%       | 5.1%       | 2.9%      | 3.2%       | 2.6%       | 3%         |
|          | Mean bias    |           | -.27       | -.09       | .18        |           | .09        | -.05       | -.14       |
|          | Lo-Up LOA    |           | -3-3       | -4-3       | -3-4       |           | -2-2       | -2-2       | -2-2       |
| SQ Set 1 | ICC          | .505      | .501       | .427       | .382       | .347      | .150       | .482       | .482       |
|          | 95% CI       | .250-.729 | .130-.754  | .029-.712  | -.009-.681 | .084-.615 | -.231-.514 | .081-.748  | .081-.748  |
|          | Significance | .001*     | .004*      | .020*      | .014*      | .004*     | .228       | .011*      | .011*      |
|          | CV           | 4.1%      | 3.8%       | 3.6%       | 4.5%       | 4.1%      | 4.4%       | 4.6%       | 3.1%       |
|          | Mean bias    |           | -.50       | .32        | .82        |           | -.59       | -.73       | -.14       |
|          | Lo-Up LOA    |           | -3-2       | -2-3       | -2-3       |           | -4-2       | -3-2       | -2-2       |
| SQ Set 2 | ICC          | .556      | .339       | .727       | .451       | .409      | .181       | .520       | .308       |
|          | 95% CI       | .309-.763 | -.041-.648 | .448-.877  | .071-.723  | .146-.662 | -.226-.545 | .121-.771  | -.121-.640 |
|          | Significance | .001*     | .038*      | .000*      | .011*      | .001*     | .196       | .002*      | .078       |
|          | CV           | 2.8%      | 3.3%       | 2.1%       | 3%         | 3.2%      | 3.2%       | 3.2%       | 3.1%       |
|          | Mean bias    |           | -.50       | -.09       | .41        |           | -.36       | -.55       | -.18       |
|          | Lo-Up LOA    |           | -3-2       | -2-2       | -2-3       |           | -3-2       | -2-1       | -2-2       |
| DL Set 1 | ICC          | .212      | .077       | -.030      | .272       | .642      | .553       | .601       | .619       |
|          | 95% CI       | .038-.504 | -.373-.484 | -.411-.376 | -.122-.606 | .416-.815 | .181-.786  | .262-.810  | .281-.821  |
|          | Significance | .051      | .370       | .557       | .091       | .001*     | .003*      | .001*      | .001*      |
|          | CV           | 7.6%      | 9.7%       | 6.3%       | 6.7%       | 2.6%      | 3%         | 2.3%       | 2.6%       |
|          | Mean bias    |           | -.09       | -.73       | -.82       |           | -.18       | -.36       | -.18       |
|          | Lo-Up LOA    |           | -6-6       | -5-4       | -5-4       |           | -2-2       | -2-2       | -2-2       |
| DL Set 2 | ICC          | .165      | .030       | -.050      | .264       | .473      | .460       | .400       | .164       |
|          | 95% CI       | .078-.461 | -.415-.447 | -.440-.364 | -.125-.598 | .214-.708 | .065-.733  | -.016-.698 | -.290-.547 |
|          | Significance | .098      | .449       | .593       | .095       | .001*     | .014*      | .031*      | .236       |



|           |      |      |      |      |      |      |       |      |
|-----------|------|------|------|------|------|------|-------|------|
| CV        | 7.4% | 9.8% | 5.5% | 6.9% | 3.4% | 3.4% | 3.2%  | 3.8% |
| Mean bias |      | .14  | -.77 | -.91 |      | .23  | .18   | -.05 |
| Lo-Up LOA |      | -7-7 | -6-5 | -6-4 |      | -2-2 | -2.-2 | -3-3 |

---

Note: RPE= Rate of Perceived Exertion, CP= Chest Press, SP= Shoulder Press, SQ= Squats, DL= Deadlifts, T1= Trial 1, T2= Trial 2, T3= Trial 3, ICC= Interclass correlation, 95% CI= 95% confidence interval, CV= Coefficient of variation, and Lo-Up LOA= Lower and Upper 95% limits of agreement, Effect Size = Trivial < Bold Text, \*= P< 0.05.
